# Supplementary material for: Gene activation-associated long noncoding RNAs function in mouse preimplantation development
Source: PubMed Central journal article supplement (PMC4352986; doi:10.1242/dev.116996), 2015-03-01
Supplement: supp_dev.116996_DEV116996supp.pdf [file supp_dev.116996_DEV116996supp.pdf]

## **Supplementary materials and methods**

### **Embryoid body formation**

Ten thousand ES cells were put on a Lipidure-Coat 96-well U-bottom plate (Thermo Scientific) and were cultured in the Alpha modification of Eagle's MEM (Gibco) supplemented with 10% FBS for 0, 3 or 6 days, and then 3  $\mu$ g of total RNA that had been extracted using TRIzol (Invitrogen) was utilized for reverse transcription with SuperScript III (Invitrogen). The synthesized cDNAs were subjected to qPCR using a KAPA SYBR Fast qPCR Kit (KAPA Biosystems). The primers used in these analyses are listed in supplementary material Table S6. *Gapdh* was used as an internal control.

### **Visualization of the MethylC-seq**

Mapped MethylC-seq data of oocytes, sperm, 2-cell embryos were obtained from GSE56697 and visualized by using GenomeJack, a genome viewer software (<http://genomejack.net/english/index.html>).

### ***In vitro* hatching**

We injected the siRNA for control, *pancTbc1d22a*-knockdown or *pancMospd3*-knockdown into fertilized 1-cell stage embryos and cultured them in M16 medium (Sigma) at 37°C under 5% CO<sub>2</sub>/air until the blastocyst stage. The blastocysts were cultured in 2i medium at 37°C under 5% CO<sub>2</sub>/air for 5 days, and the rate of hatching from zona pellucida was calculated.

### **Supplementary figure legends**

Fig. S1. Assessment of directional RNA-seq sample reads. (A) Scatter plots of gene expression in all sequenced samples. Each sample category consisted of four replicates each of MII oocytes (MII\_1 to MII\_4) and 2-cell embryos (F2\_1 to F2\_4). RPKMs of the RefSeq genes are plotted. (B) Hierarchical clustering of sequenced samples based on the gene expression levels. Jensen-Shannon distance was used for drawing the dendrogram, which indicates that our directional RNA-seq data clearly discriminate MII oocytes and 2-cell embryos.

Fig. S2. Density plots of RNA-seq reads mapped to the RefSeq genes. For MII oocytes and 2-cell embryos, we compared the reads reported by Park *et al.*, 2013 (A) with our

datasets (B). Our data previously reported in Uesaka *et al.*, 2014 are shown as an example of an adult tissue sample (C).

Fig. S3. Number of upregulated pancRNAs and mRNAs in 2-cell embryos. The Venn diagram shows the number of pancRNAs (568 in total) and mRNAs (520 in total) upregulated two-fold or more at the 2-cell stage. Note that the expression levels of most of the mRNAs and their corresponding pancRNAs are co-regulated.

Fig. S4. The existence of CpG island (CpGi) and CT-rich motif in pancRNA-partnered genes. (A) The occurrence of the CpGi within the pancRNA-partnered genes. (B) The occurrence of the CT-rich motif within the CpGi-genes. (C) The occurrence of the CT-rich motif within the pancRNA-partnered genes.

Fig. S5. Schematic representation of genomic features in pancRNA-lacking and pancRNA-partnered genes.

Fig. S6. The representation of MethylC-seq data (Wang et al., 2014) and our RNA-seq data at *Il17d*, *Mospd3* and *Tbc1d22a* loci. Amplified regions are shaded.

Fig. S7. The DNA methylation status of the region around the TSS of *Il17d* before and after fertilization. Thick horizontal lines denote the regions analyzed by bisulfite sequencing. Primer positions are numbered relative to the TSS of *Il17d*.

Fig. S8. The DNA methylation status of the region around the TSS of *Il17d* in *pancIl17d*-knockdown 2-cell embryos.

Fig. S9. Survival rate of control and *pancIl17d*-knockdown embryos at various developmental stages. For all knockdown experiments, siRNA for *pancRNA* was injected at the pronuclear stage. Early and late blastocysts were collected from cultures at times corresponding to 69 h and 88 h after hCG injection, respectively. Note that knockdown of *pancIl17d* reduced the viability of embryos by the early blastocyst stage. Asterisks indicate significant differences compared with *si Control* samples. \*\*\*,  $p < 0.001$ .

Fig. S10. Developmental effect of *pancMospd3*-knockdown. (A) Morphology of the si Control- and si *pancMospd3*-injected embryos 5 days after outgrowth *in vitro*. Arrows indicate the zona pellucida. Numbers of embryos used for the experiment of si Control, si *pancMospd3* and si *pancTbc1d22a* siRNAs were 177, 106 and 84, respectively. (B) The rate of hatching from zona pellucida. (C) The number of *pancMospd3*-knockdown ES cells. Cell count was performed 3 days after the passage of  $1 \times 10^5$  cells.

Fig. S11. Relative expression levels of down-regulated and up-regulated top-3-ranked genes in *pancI17d*-knockdown morula. Blue and red bars indicate the RPKM values of Control and *pancI17d*-knockdown morula, respectively.

Fig. S12. Effect on the embryoid body (EB) formation in *pancI17d*-knockdown ES cells. (A) Experimental scheme for shRNA-based *pancI17d* knockdown in ES cells. Horizontal line indicates the time course of experiment. After the infection of shRNA for control and *pancI17d* vectors, cells were selected for 5 days and utilized for embryoid body formation and qPCR analysis. (B) Representative control and

*pancI17d*-knockdown EBs. (C) The diameters of EBs. (D) The knockdown efficiency of *pancI17d* and *I17d* at day 0. (E) Relative expression changes of marker genes during EB formation.

Fig. S13. The DNA methylation status of the region around the TSS of *I17d* in *Tet3*-knockdown and ABA-treated 2-cell embryos.

Fig. S14. The relative expression levels of *I17d* and *pancI17d* in ABA-treated and control embryos.

Fig. S15. A representation of RNA-seq data of the *I17d* locus. Blue and red signals indicate the expression levels of *pancRNA* and *mRNA*, respectively

Fig. S16. Developmental effect of *pancBag6*-knockdown. The number of *pancBag6*-knockdown ES cells. Cell counting was performed 3 days after the passage of  $1 \times 10^5$  cells.

A

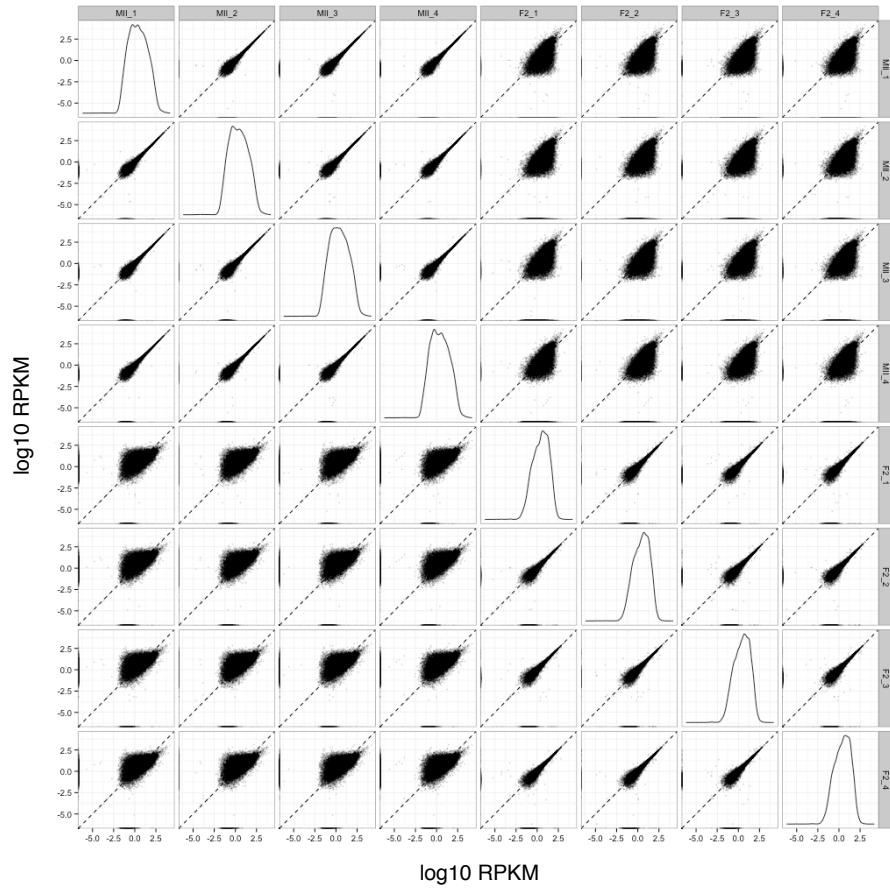

B

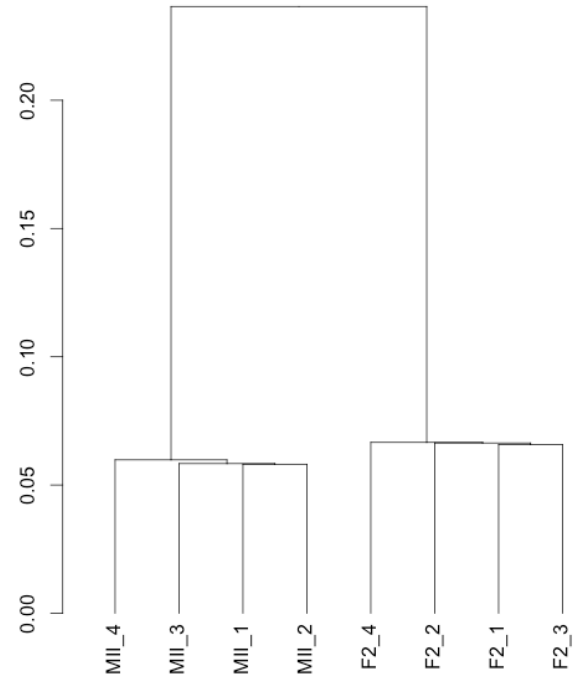

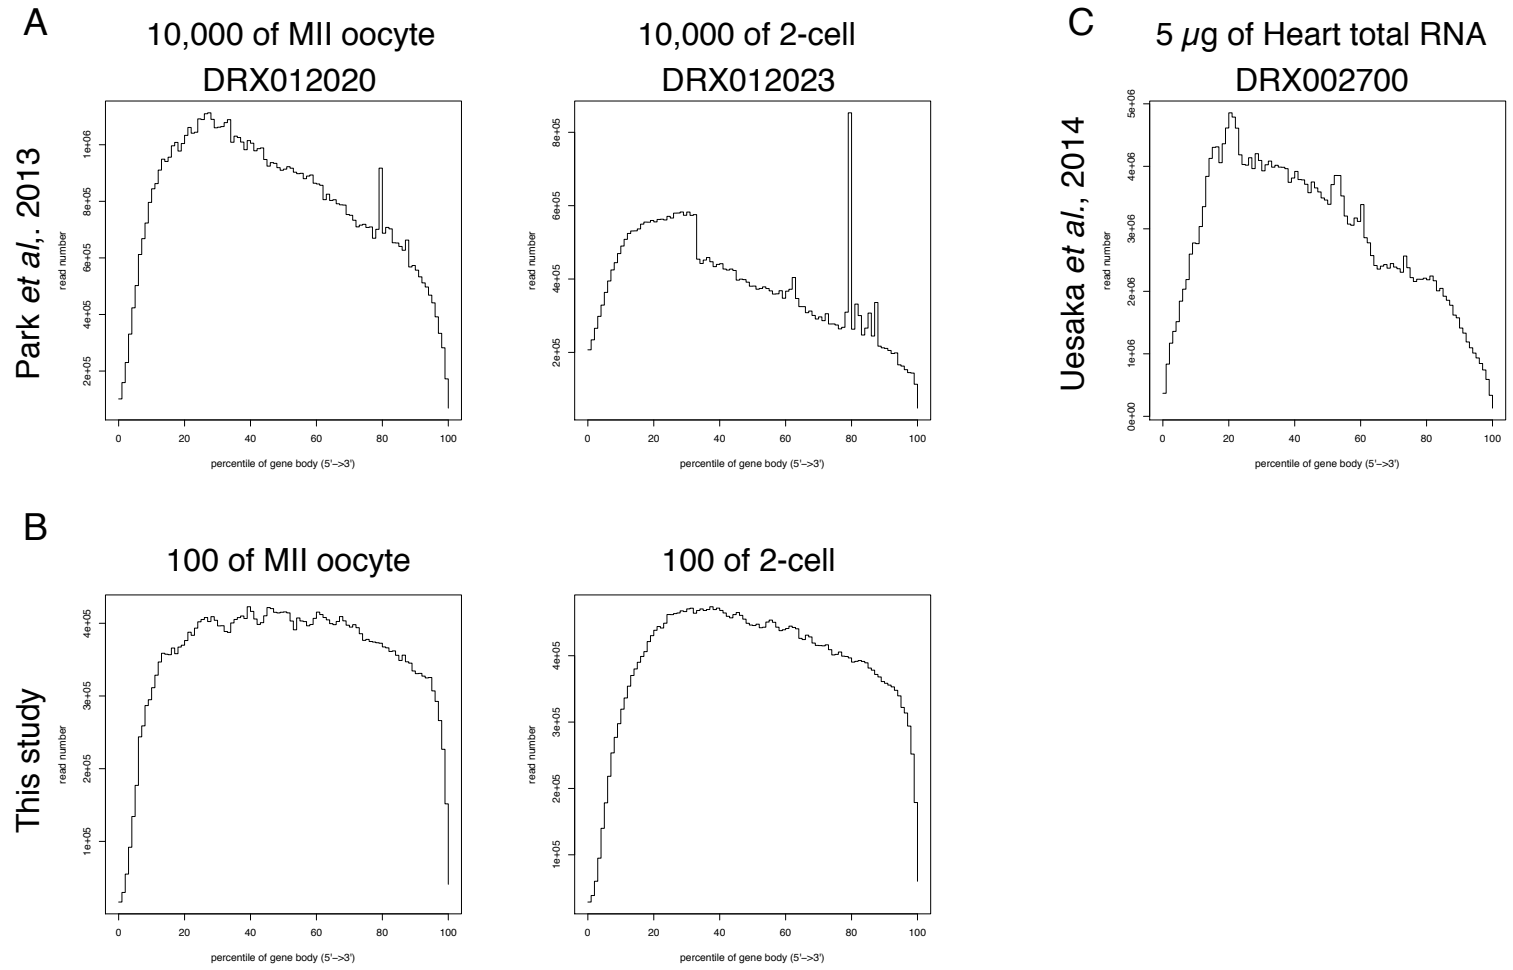



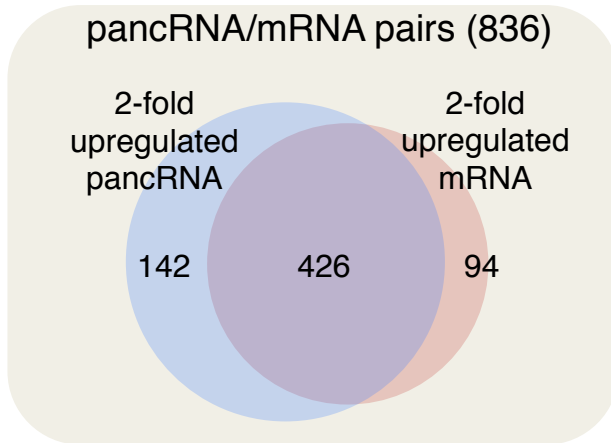

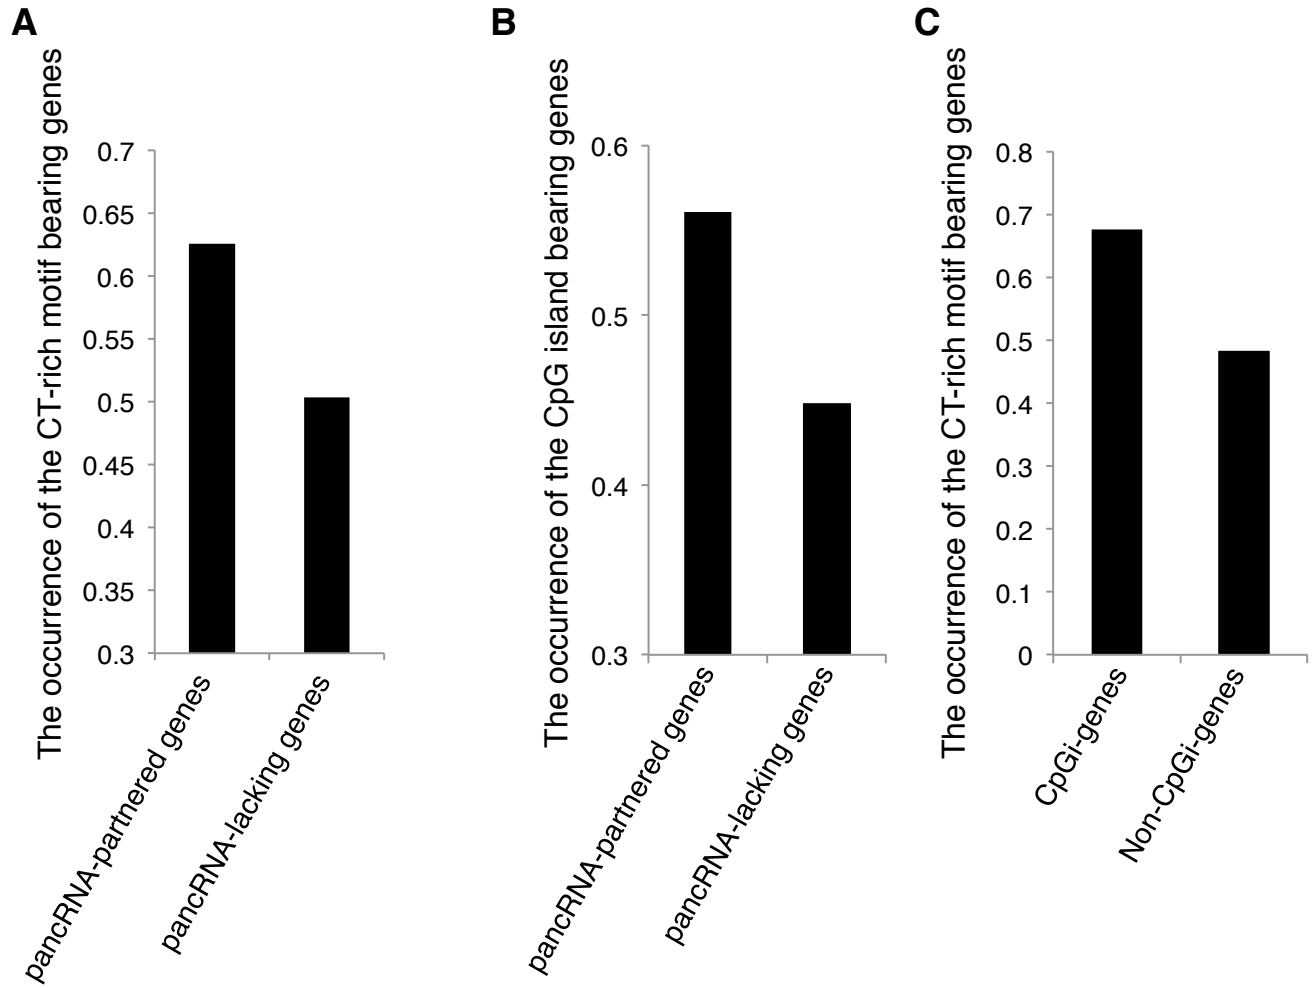

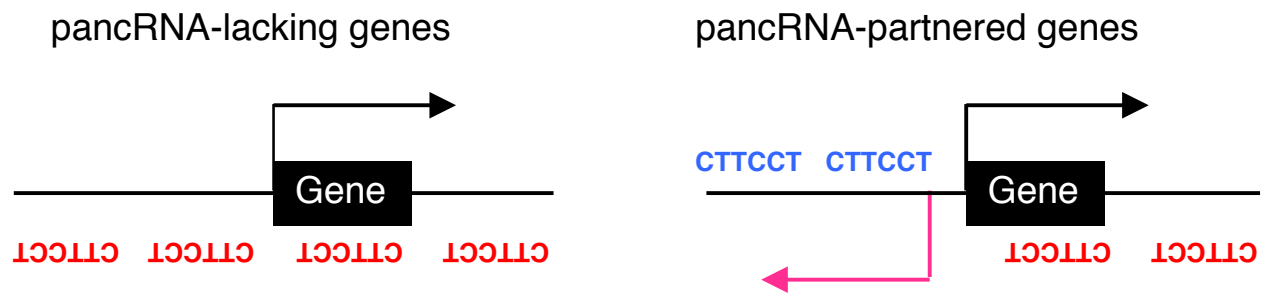

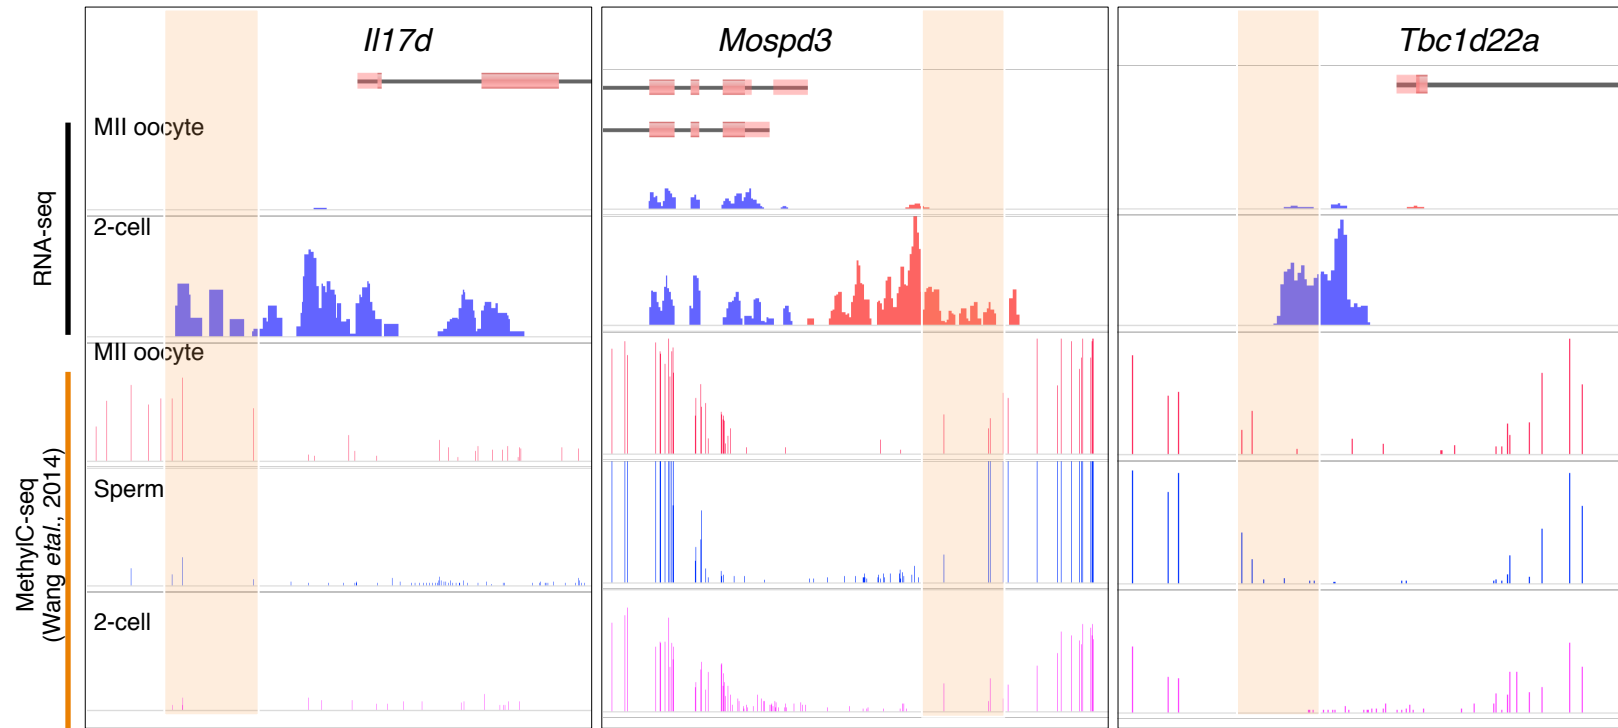

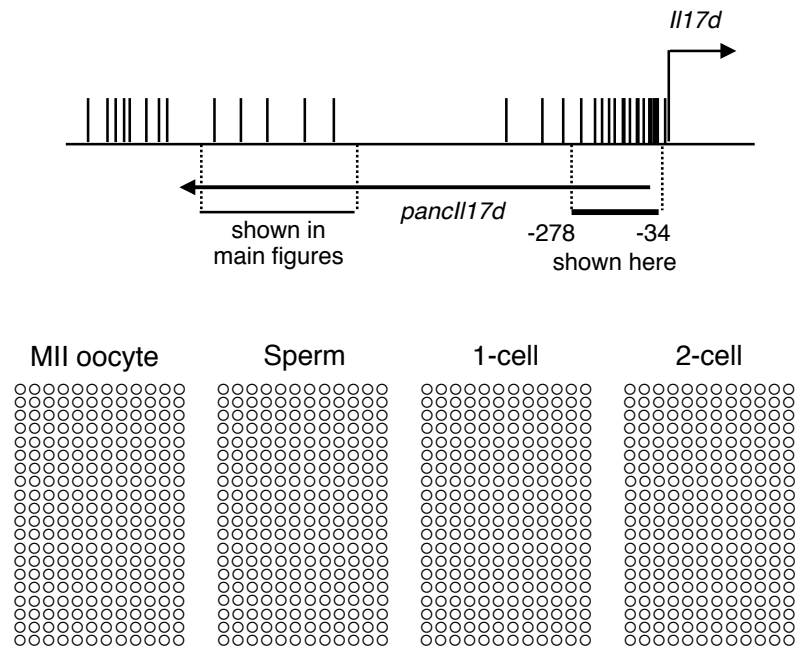



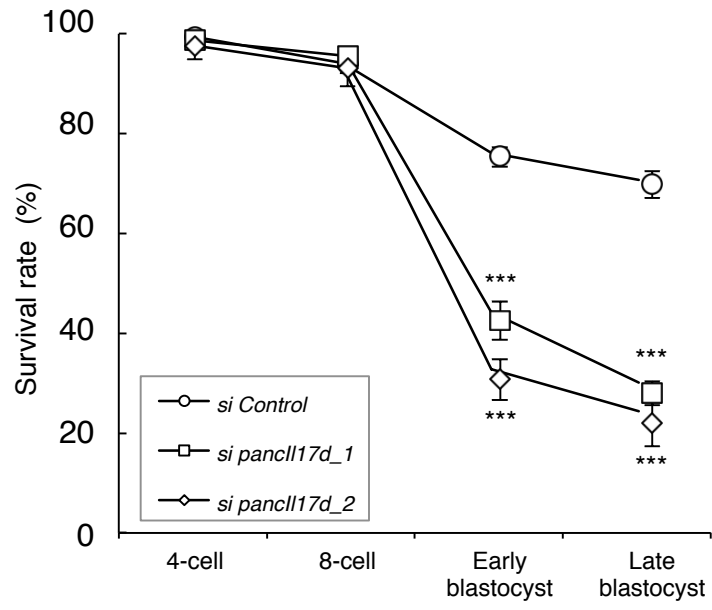

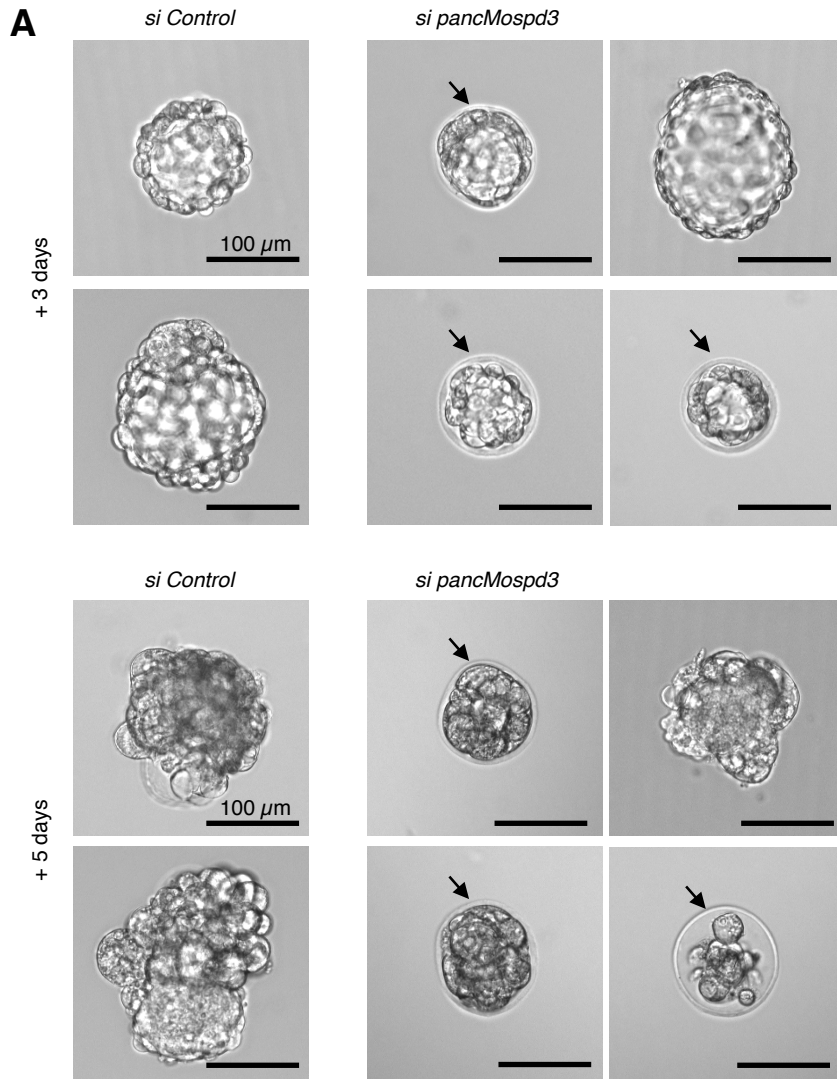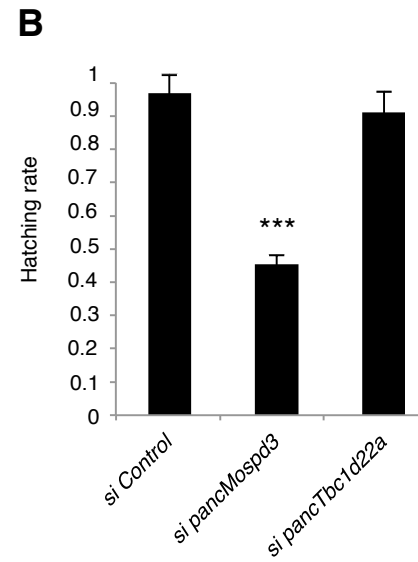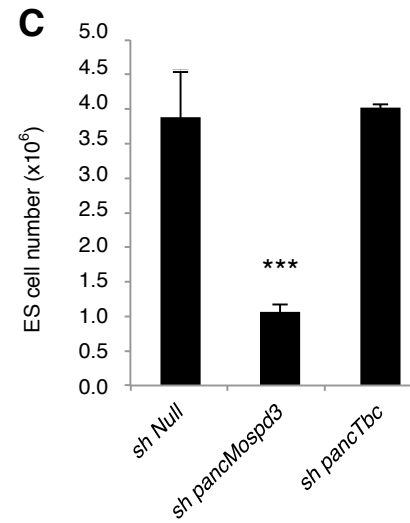



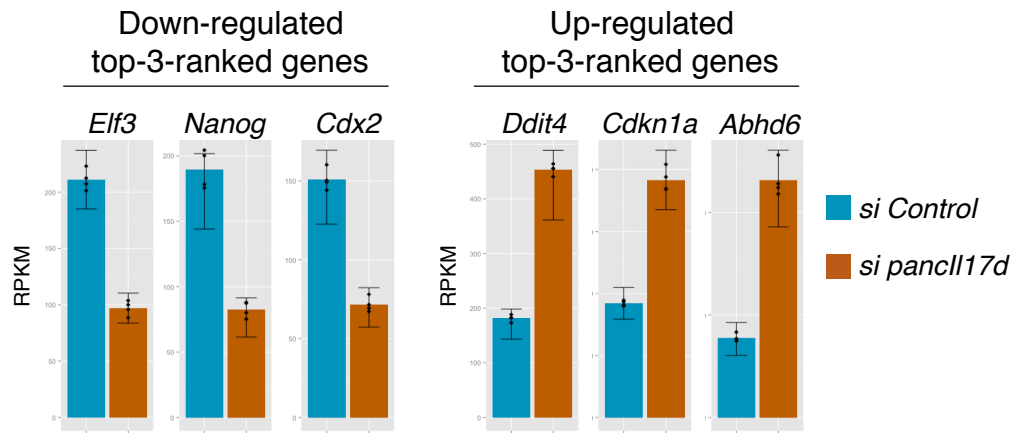

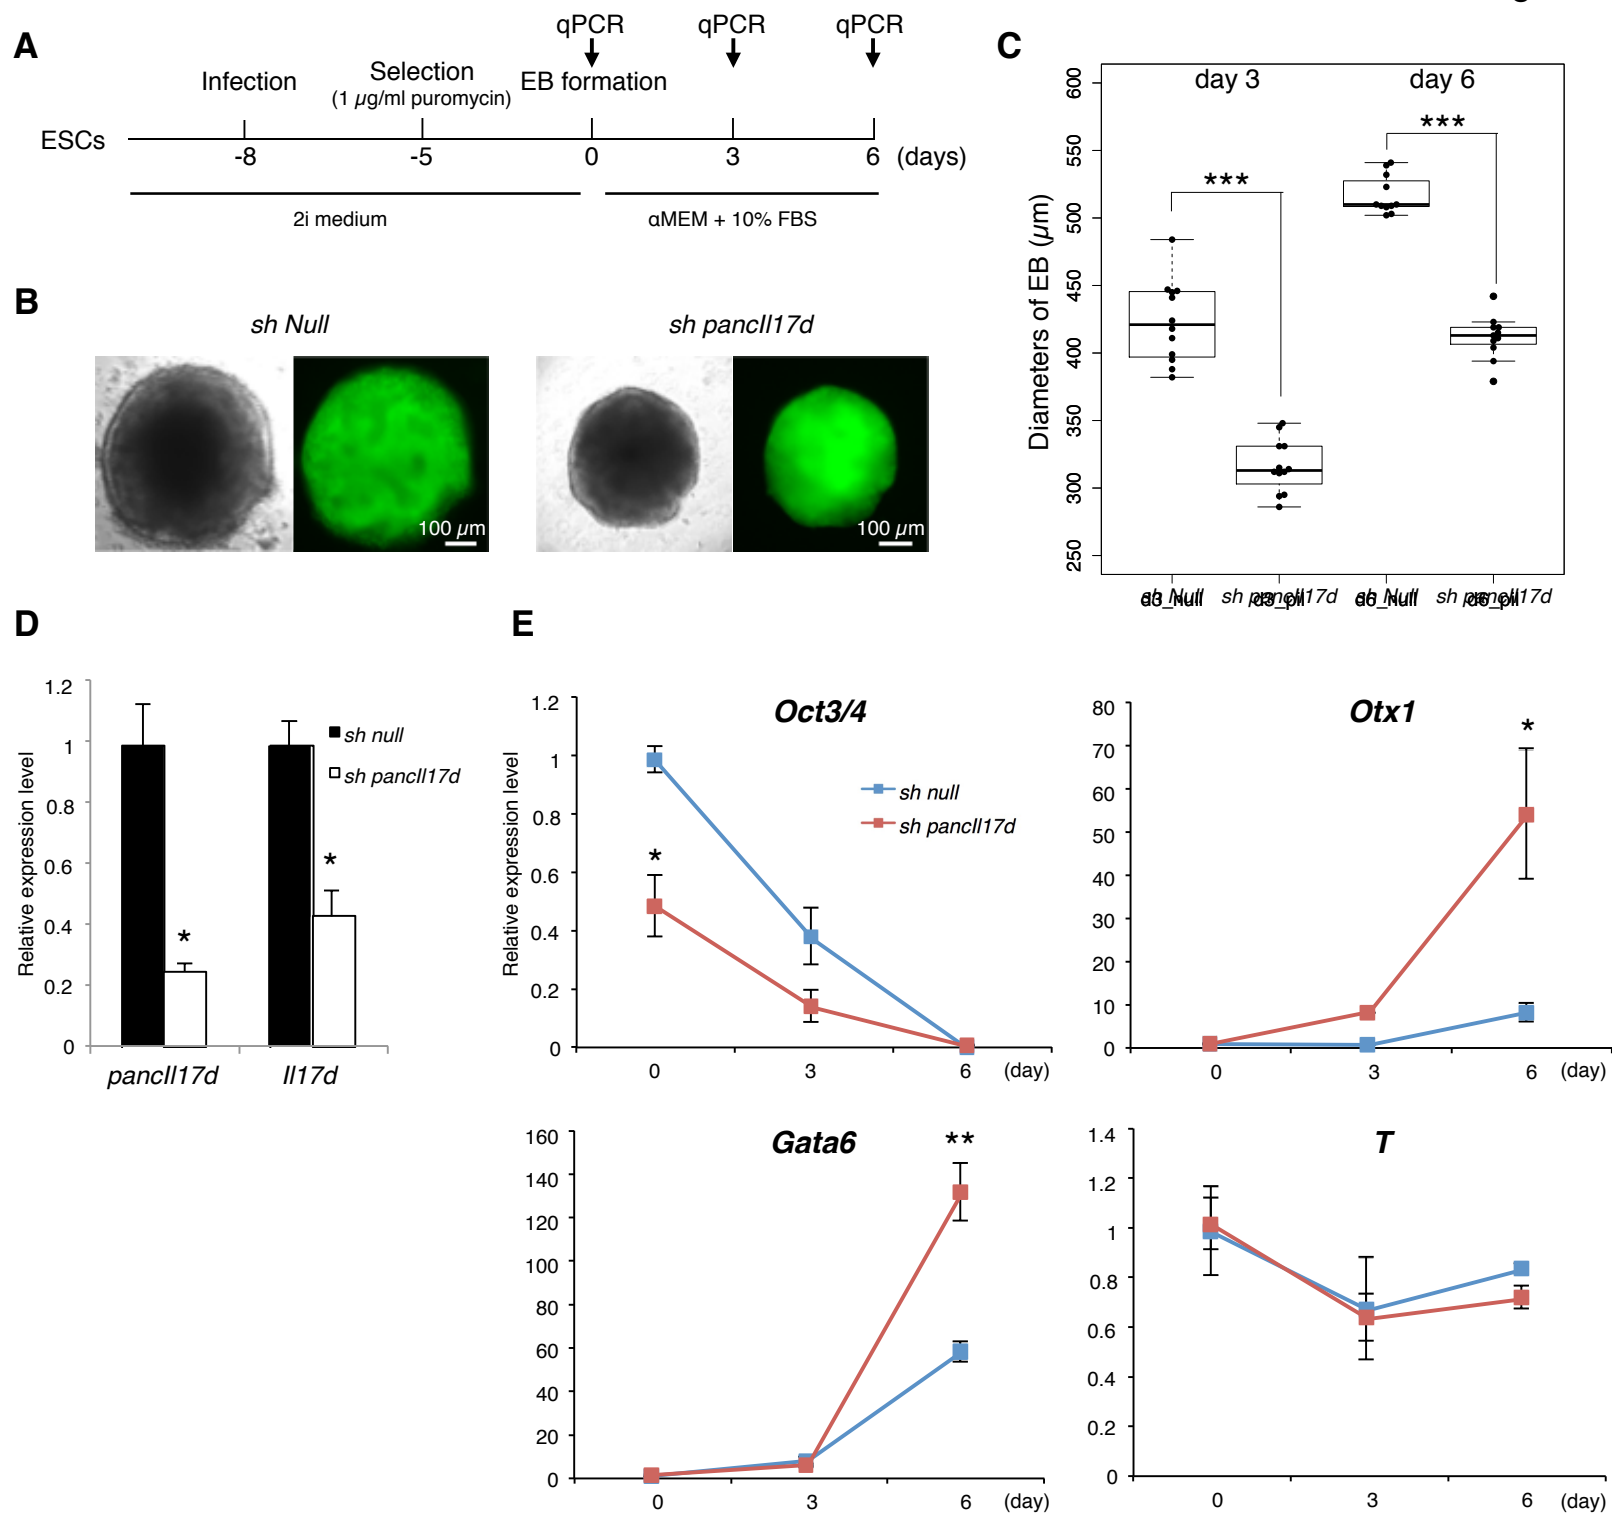

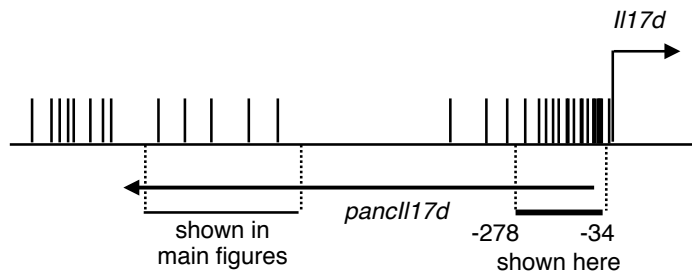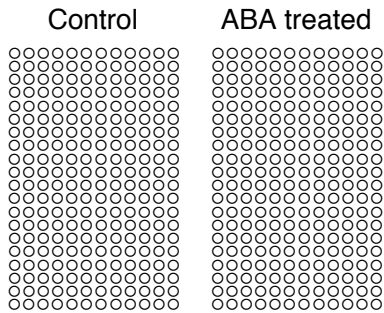

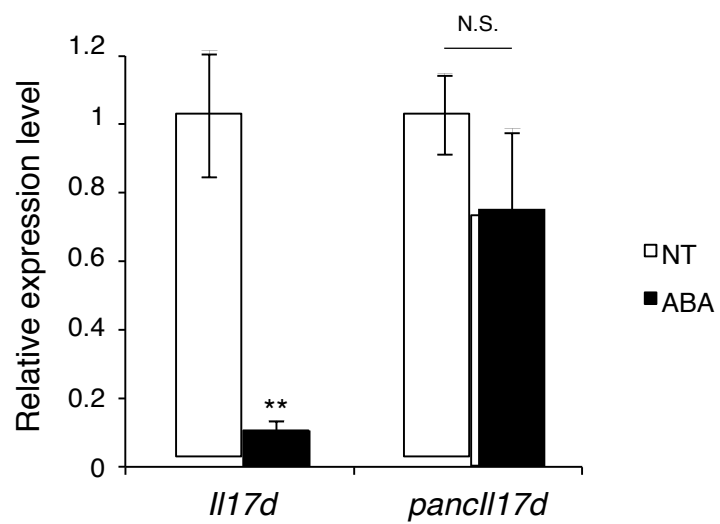

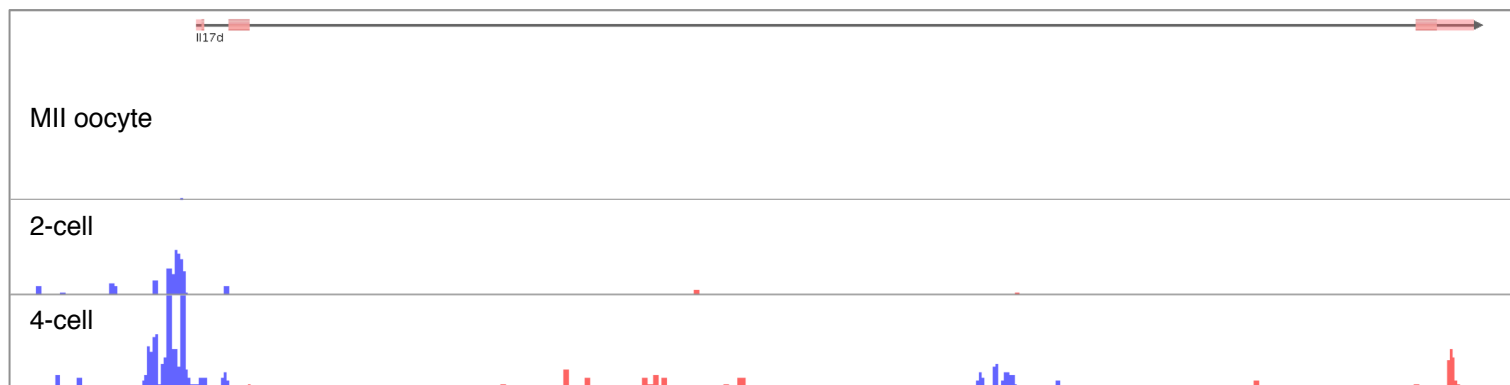

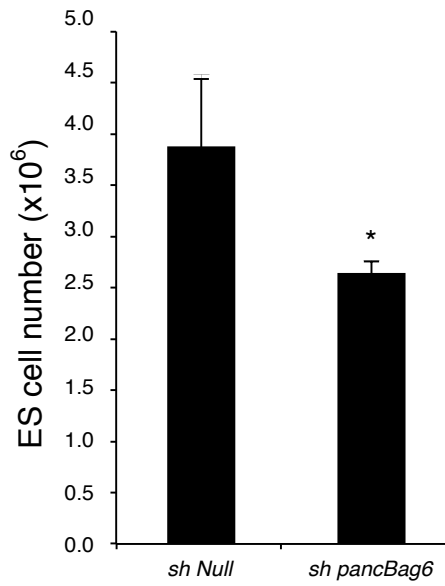

**Table S1**

[Click here to Download Table S1](#)

**Table S2**

[Click here to Download Table S2](#)

**Table S3**

[Click here to Download Table S3](#)

**Table S4**

[Click here to Download Table S4](#)

**Table S5**

[Click here to Download Table S5](#)

Table S6 List of the primers used in this study

|                                           |                                |
|-------------------------------------------|--------------------------------|
| <b>Bisulfite <i>Il17d</i> forward</b>     | TTAAGTTGTAAGGTTTGAAGGGAT       |
| <b>Bisulfite <i>Il17d</i> reverse</b>     | ACTTACTCACTTACTTATTC           |
| <b>Bisulfite <i>Il17d</i> TSS forward</b> | TAGTTGAATAAGAGGTATGGAG         |
| <b>Bisulfite <i>Il17d</i> TSS reverse</b> | CTCACCAATATCCCCAACATCA         |
| <b>Bisulfite <i>Mospd3</i> forward</b>    | AGTGGGAAGAATGTAGTTTTTATTGTT    |
| <b>Bisulfite <i>Mospd3</i> reverse</b>    | TCTTACCCACAATTTCACTTAAAAA      |
| <b>Bisulfite <i>Tbc1d22a</i> forward</b>  | ATGTATTTTATAATTAAGTATATTTTATTG |
| <b>Bisulfite <i>Tbc1d22a</i> reverse</b>  | CTATAATATAATCCAAACCTCATC       |
| <b>qPCR <i>pancMospd3</i> forward</b>     | CTGCGGGAACCTCAACATCAC          |
| <b>qPCR <i>pancMospd3</i> reverse</b>     | CTTGGGCAGAAATCCACCTCT          |
| <b>qPCR <i>Mospd3</i> forward</b>         | TGATCTCCCCCTGTCCTCTTT          |
| <b>qPCR <i>Mospd3</i> reverse</b>         | AGTTCCCGTGGGGTTGTAGA           |
| <b>qPCR <i>pancIl17d</i> forward</b>      | GGAAAACAGCCTCCTTCTAGCC         |
| <b>qPCR <i>pancIl17d</i> reverse</b>      | TCTCCTTCTTGCGACCACTTC          |
| <b>qPCR <i>Il17d</i> forward</b>          | TCACACACATCCCGTTTTCC           |
| <b>qPCR <i>Il17d</i> reverse</b>          | CCGGAGCACTCATTATCACC           |
| <b>qPCR <i>pancTbc1d22a</i> forward</b>   | TCGTGTCTCCGTGCCTATTC           |
| <b>qPCR <i>pancTbc1d22a</i> reverse</b>   | TTCTCCCGCTGTAGTGTGGT           |
| <b>qPCR <i>Tbc1d22a</i> forward</b>       | TTGTGCTGCTTTCCTCGTGA           |
| <b>qPCR <i>Tbc1d22a</i> reverse</b>       | AGGCAGAGAGGGGATGCTAT           |
| <b>qPCR <i>Oct3/4</i> forward</b>         | GGCGTTCTCTTTGGAAAGGTGTTC       |
| <b>qPCR <i>Oct3/4</i> reverse</b>         | CTCGAACCACATCCTTCTCT           |
| <b>qPCR <i>Sox2</i> forward</b>           | CACAGATGCAACCGATGCA            |
| <b>qPCR <i>Sox2</i> reverse</b>           | GGTGCCCTGCTGCGAGTA             |
| <b>qPCR <i>c-Myc</i> forward</b>          | ACGACAGCAGCTCGCCCAAATC         |
| <b>qPCR <i>c-Myc</i> reverse</b>          | TGGAGCACTTGC GGTTGTTGCT        |
| <b>qPCR <i>Klf4</i> forward</b>           | ACCTGGCGAGTCTGACATGGCT         |
| <b>qPCR <i>Klf4</i> reverse</b>           | AGGATGAAGCTGACGCCGAGGT         |
| <b>qPCR <i>Cdh1</i> forward</b>           | CGACCGGAAGTGACTCGAAA           |
| <b>qPCR <i>Cdh1</i> reverse</b>           | AACCACTGCCCTCGTAATCG           |
| <b>qPCR <i>Otx1</i> forward</b>           | TGCCATGGACCTCCTGCACC           |
| <b>qPCR <i>Otx1</i> reverse</b>           | GTTCCATTCCCGCTCTGCTG           |
| <b>qPCR <i>T</i> forward</b>              | GCTTCAAGGAGCTAACTAACGAG        |
| <b>qPCR <i>T</i> reverse</b>              | CCAGCAAGAAAGAGTACATGGC         |
| <b>qPCR <i>Gata6</i> forward</b>          | TCATTACCTGTGCAATGCATGCGG       |
| <b>qPCR <i>Gata6</i> reverse</b>          | ACGCCATAAGGTAGTGGTTGTGGT       |



Table S7 List of siRNAs and shRNAs used in this study

|                           |                                                                       |
|---------------------------|-----------------------------------------------------------------------|
| si <i>pancI17d_1</i>      | GCUCAAAUGAAGGACUCUA                                                   |
| si <i>pancI17d_2</i>      | GCAUUUACGCUUUGAGAAU                                                   |
| si <i>pancMospd3</i>      | UAAAUCUUUCCAGAAAAUCCA                                                 |
| si <i>pancTbc1d22a</i>    | UUAACAUUUCGUAUUAAAGAU                                                 |
| si <i>Tet2</i>            | GGAUGUAAGUUUGCCAGAAGC                                                 |
| si <i>Tet3</i>            | GCUCCAACGAGAAGCUAUUUG                                                 |
| si <i>I17d</i>            | CCGAACACUACAUCACCAUTT                                                 |
| sh <i>pancMospd3</i> Fw   | TGAAACTCTGGGAATTCAAAAATTTCAAGAGAATTTTGAATTCCTCCAGAGTTTCTTTTTGGAAC     |
| sh <i>pancMospd3</i> Rv   | TCGAGTTCCAAAAAAGAAACTCTGGGAATTCAAAAATCTCTTGAAATTTTGAATTCCTCCAGAGTTTCA |
| sh <i>pancTbc1d22a</i> Fw | TGGAAATGTTAATTATAAGTTTTTCAAGAGAAAACTTATAATTAACATTTCTTTTTTGGAAAC       |
| sh <i>pancTbc1d22</i> Rv  | TCGAGTTCCAAAAAAGGAAATGTTAATTATAAGTTTTCTCTTGAAAACTTATAATTAACATTTCCA    |
| sh <i>pancBag6</i> Fw     | TGTAATTTCTCGAGAAAAATTTTCAAGAGAAATTTTCTCGAGGAAATTAATTTTTTGGAAAC        |
| sh <i>pancBag6</i> Rv     | TCGAGTTCCAAAAAAGTAATTTCTCTCGAGAAAAATTTCTCTTGAAAAATTTTCTCGAGGAAATTAACA |
